# Supplementary material for: Prevalence and Infection Intensity of Human and Animal Tungiasis in Napak District, Karamoja, Northeastern Uganda
Source: MDPI journal article supplement (doi:10.3390/tropicalmed8020111), 2023-02-11
Supplement: s1 [file s1]

**Table S3:** Economic features, sanitation, hygiene and living conditions in the households (N=1,278).

| Characteristics                    | Categories                            | Frequencies (%) |
|------------------------------------|---------------------------------------|-----------------|
| Occupation of household head       | Peasant/Pastoralist                   | 235 (18.4)      |
|                                    | Casual laborer                        | 267 (20.9)      |
|                                    | None                                  | 657 (51.4)      |
|                                    | Small business                        | 100 (7.8)       |
|                                    | Formal job sector                     | 17 (1.3)        |
|                                    | Others (VHT and LC leader)            | 2 (0.2)         |
|                                    |                                       |                 |
| Ownership of house                 | Own house                             | 803 (62.8)      |
|                                    | Rented house                          | 22 (1.7)        |
|                                    | Temporarily accommodated (squatter)   | 453 (35.5)      |
| Possessing own farming land        | Yes                                   | 1, 151 (90.1)   |
|                                    | No                                    | 127 (9.9)       |
| Number of meals per day            | Irregular <sup>1</sup>                | 88 (6.9)        |
|                                    | 1                                     | 872 (73.3)      |
|                                    | 2                                     | 296 (24.9)      |
|                                    | 3-4                                   | 21 (1.6)        |
|                                    |                                       |                 |
| Construction of house walls        | Mud and wattle                        | 1,241 (97.1)    |
|                                    | Blocks/bricks and mud                 | 13 (1.0)        |
|                                    | Bricks and sand/plastered             | 24 (1.9)        |
| Construction of the roof           | Natural/grass                         | 1,201 (94.0%)   |
|                                    | Iron sheets                           | 38 (3.0%)       |
|                                    | Tiles                                 | 39 (3.0%)       |
| Floor type                         | Concrete/tiles/terrazzo               | 6 (0.5)         |
|                                    | Loose soil/dusty/sandy                | 400 (31.3)      |
|                                    | Compact soil/smeared with cattle dung | 871 (68.2)      |
| Source of water                    | Shared community borehole             | 1,170 (91.5)    |
|                                    | Shared community tap                  | 93 (7.3)        |
|                                    | Tap in compound                       | 12 (0.9)        |
|                                    | Rain water/river                      | 3 (0.3)         |
| Disposal of faeces                 | Bush                                  | 966 (75.6)      |
|                                    | Traditional latrine                   | 292 (22.9)      |
|                                    | Ventilated improved pit latrine       | 18 (1.4)        |
|                                    | Flush toilet                          | 2 (0.1)         |
| Disposal of household waste        | Burning                               | 404 (31.6)      |
|                                    | Garden/bush near compound             | 402 (31.5)      |
|                                    | Garden/bush far from compound         | 279 (21.8)      |
|                                    | Pit                                   | 192 (15.0)      |
|                                    | Animal dwellings                      | 1 (0.1)         |
| Use of soap when cleaning the body | Yes                                   | 568 (44.4)      |
|                                    | No                                    | 710 (55.6)      |

<sup>1</sup>Missed a meal a day before and are not always sure of getting what to eat for any day.
