# Supplementary material for: Prevalence and Infection Intensity of Human and Animal Tungiasis in Napak District, Karamoja, Northeastern Uganda
Source: MDPI journal article supplement (doi:10.3390/tropicalmed8020111), 2023-02-11

**Figure S1: Infection of tungiasis on the human hand (A) and tungiasis infection on the digits of a pig (B)**

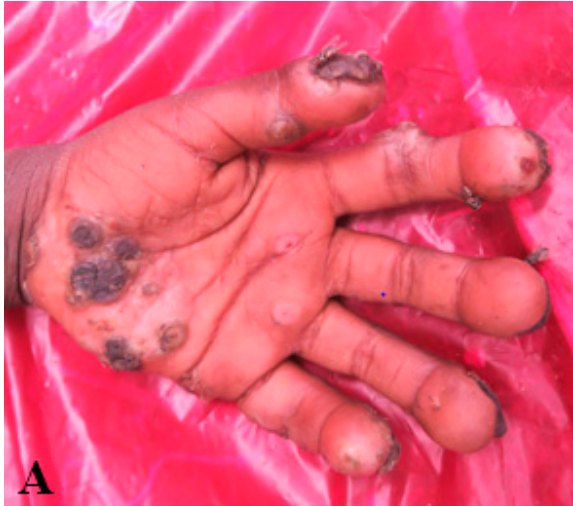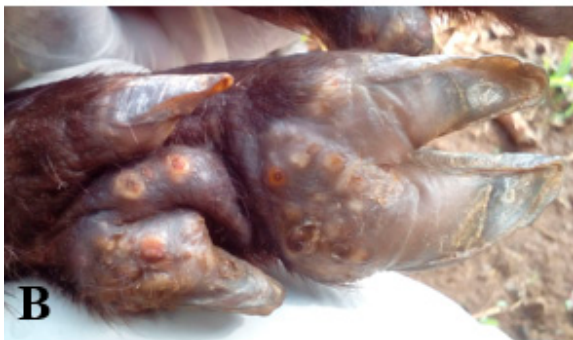

Supplement: s1 [file s1]
