# Supplementary material for: Prevalence and Infection Intensity of Human and Animal Tungiasis in Napak District, Karamoja, Northeastern Uganda
Source: MDPI journal article supplement (doi:10.3390/tropicalmed8020111), 2023-02-11
Supplement: s1 [file s1]

**Table S4.** Animal keeping practices in the participating households (n=568).

| <b>Animal keeping practice</b>           | <b>Category</b>         | <b>Frequency (%)</b> |
|------------------------------------------|-------------------------|----------------------|
| Keeping dogs on compound                 | Yes                     | 134 (23.6)           |
| Control of ectoparasites in dogs (n=134) | Yes                     | 15 (11.2)            |
| Keeping cats                             | Yes                     | 238 (41.9)           |
| Control of ectoparasites in cats (n=238) | Yes                     | 37 (15.6)            |
| Keeping goats                            | Yes                     | 335 (59)             |
| Method of keeping goats (n=335)          | Tethering               | 16 (4.8)             |
|                                          | Herding                 | 319 (95.2)           |
| Keeping sheep                            | Yes                     | 362 (63.7)           |
| Method of keeping sheep (n=362)          | Herding/roaming         | 358 (98.9)           |
|                                          | Tethering               | 4 (1.1)              |
| Keeping cattle                           | Yes                     | 433 (76.2)           |
| Method of keeping cattle (n=433)         | Herding/roaming         | 426 (98.4)           |
|                                          | Tethered                | 7 (1.6)              |
| Keeping donkeys                          | Yes                     | 7 (1.2)              |
| Keeping chicken                          | Yes                     | 378 (66.5)           |
| Chicken rearing system (n=378)           | Free range              | 376 (99.5)           |
|                                          | Intensive (deep litter) | 2 (0.5)              |
