# Supplementary material for: Prevalence and Infection Intensity of Human and Animal Tungiasis in Napak District, Karamoja, Northeastern Uganda
Source: MDPI journal article supplement (doi:10.3390/tropicalmed8020111), 2023-02-11
Supplement: s1 [file s1]

**Table S1.** Census of residents and number examined in the 17 study villages.

| <b>Village</b>               | <b>Number of people identified (%)</b> | <b>Number examined (%)</b> | <b>Proportion of people present / examined (%)</b> |
|------------------------------|----------------------------------------|----------------------------|----------------------------------------------------|
| <b>Naitakwae parish</b>      |                                        |                            |                                                    |
| Naregae                      | 266 (4.8)                              | 189 (4.7)                  | 71.1                                               |
| Kakutalem                    | 300 (5.5)                              | 165 (4.1)                  | 55.0                                               |
| Karuko                       | 310 (5.7)                              | 223 (5.5)                  | 71.9                                               |
| Narongor                     | 187 (3.4)                              | 124 (3.1)                  | 66.3                                               |
| Lowatakau                    | 197 (3.6)                              | 138 (3.4)                  | 70.1                                               |
| Lokodiokodioi                | 148 (2.7)                              | 104 (2.6)                  | 70.3                                               |
| Lomaliga                     | 534 (9.7)                              | 304 (7.5)                  | 56.9                                               |
| <b>Sub total</b>             | <b>1,942 (35.4)</b>                    | <b>1,247 (30.9)</b>        | <b>64.2</b>                                        |
| <b>Nawaikorot parish</b>     |                                        |                            |                                                    |
| Lomerimongo                  | 189 (3.4)                              | 158 (3.9)                  | 83.6                                               |
| Longariama                   | 449 (8.2)                              | 347 (8.6)                  | 77.3                                               |
| Konyanga                     | 220 (4.0)                              | 148 (3.7)                  | 67.3                                               |
| Loolimo                      | 115 (2.1)                              | 91 (2.3)                   | 79.1                                               |
| Nawaikorot A                 | 311 (5.7)                              | 240 (6.0)                  | 77.2                                               |
| Too Ekitela                  | 328 (6.0)                              | 210 (5.2)                  | 64.0                                               |
| <b>Sub total</b>             | <b>1,612 (29.4)</b>                    | <b>1,194 (29.6)</b>        | <b>74.1</b>                                        |
| <b>Nagule Angolol parish</b> |                                        |                            |                                                    |
| Nagule Angolol A             | 495 (9.0)                              | 434 (10.8)                 | 87.7                                               |
| Nagule Angolol B             | 439 (8.0)                              | 283 (7.0)                  | 64.5                                               |
| Nakipumia                    | 710 (13.0)                             | 629 (15.5)                 | 88.6                                               |
| Lokalumok                    | 284 (5.2)                              | 248 (6.1)                  | 87.3                                               |
| <b>Sub total</b>             | <b>1,928 (35.2)</b>                    | <b>1,594 (39.5)</b>        | <b>82.7</b>                                        |
| <b>Overall Total</b>         | <b>5,482 (100)</b>                     | <b>4,035 (100)</b>         | <b>73.6</b>                                        |
