# Supplementary material for: Prevalence and Infection Intensity of Human and Animal Tungiasis in Napak District, Karamoja, Northeastern Uganda
Source: MDPI journal article supplement (doi:10.3390/tropicalmed8020111), 2023-02-11
Supplement: s1 [file s1]

**Table S2:** Socio-demographic characteristics of households (N=1,278).

| Characteristic                    | Categories                     | Frequency (%) |
|-----------------------------------|--------------------------------|---------------|
| Marital status of household head  | Polygamous marriage            | 658 (51.5)    |
|                                   | Monogamous marriage            | 430 (33.6)    |
|                                   | Widowed                        | 145 (11.3)    |
|                                   | Single                         | 34 (2.7)      |
|                                   | Divorced/Separated             | 11 (0.8)      |
| Gender of household head          | Female                         | 770 (60.3)    |
|                                   | Male                           | 508 (39.7)    |
| Education level of household head | None <sup>1</sup>              | 1,097 (85.8)  |
|                                   | Some Primary <sup>2</sup>      | 122 (9.5)     |
|                                   | Completed primary              | 19 (1.5)      |
|                                   | Some secondary <sup>2</sup>    | 29 (2.3)      |
|                                   | Completed secondary and beyond | 11 (0.9)      |
| Religion of household head        | Christian                      | 1,213 (94.9)  |
|                                   | Traditional religion           | 54 (4.2)      |
|                                   | Muslim                         | 6 (0.5)       |
|                                   | None                           | 5 (0.4)       |
| Ethnicity of household head       | Karamojong                     | 1,275 (99.8)  |
|                                   | Iteso                          | 2 (0.1)       |
|                                   | Others (Kenyan origin)         | 1 (0.1)       |
| Disability of household head      | None                           | 992 (77.6)    |
|                                   | Physical                       | 266 (20.8)    |
|                                   | Mental                         | 15 (1.2)      |
|                                   | Both physical and mental       | 5 (0.4)       |

<sup>1</sup>Has never been to any formal school.

<sup>2</sup>Attended formal primary or secondary school, respectively but never completed it.
