# Supplementary material for: Prevalence and Infection Intensity of Human and Animal Tungiasis in Napak District, Karamoja, Northeastern Uganda
Source: Trop Med Infect Dis. 2023 Feb 11;8(2):111. doi: 10.3390/tropicalmed8020111 (PMC9963877; doi:10.3390/tropicalmed8020111)
Supplement: Supplementary file 1 [file tropicalmed-08-00111-s001.zip]

Archive with 6 entries (6 files):
- Figure S1.pdf
- Figure S1.PNG
- Table S1.pdf
- Table S2.pdf
- Table S3.pdf
- Table S4.pdf
